# Supplementary material for: Identification of biomarkers for immunotherapy response in prostate cancer and potential drugs to alleviate immunosuppression
Source: publisher site journal article supplement (doi:10.18632/aging.204115), 2022-06-08
Supplement: Supplementary file [file aging-v14i11-204115-supplementary-material-SD1.pdf]

## SUPPLEMENTARY FIGURE

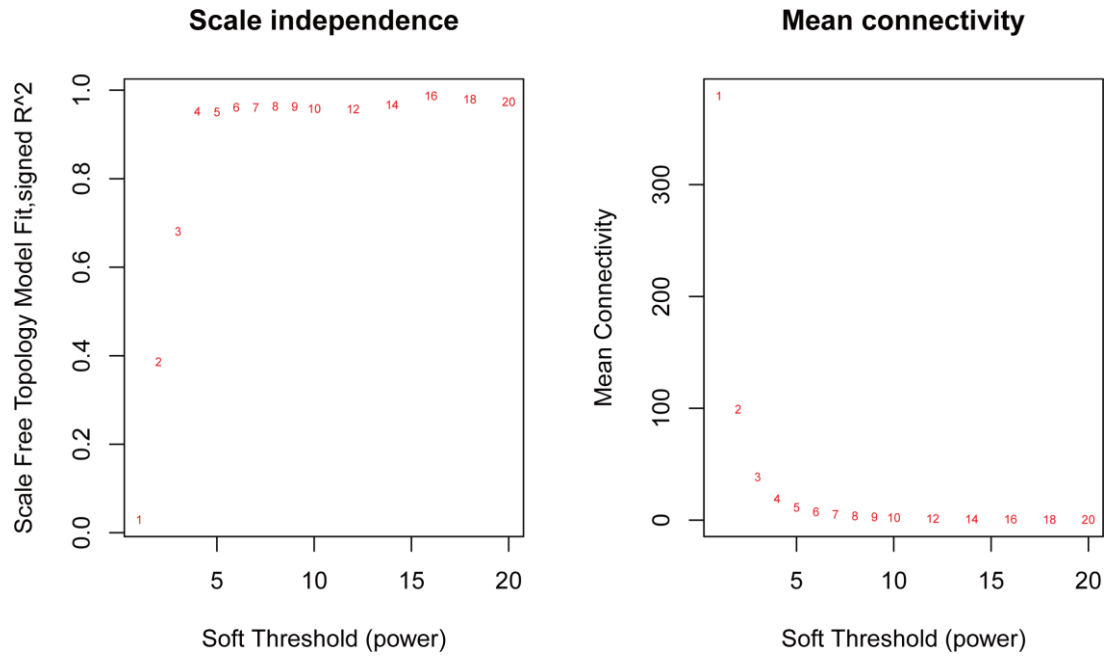

Supplementary Figure 1. Threshold determination for weighted gene co-expression network analysis.
