# Supplementary material for: Identification of biomarkers for immunotherapy response in prostate cancer and potential drugs to alleviate immunosuppression
Source: publisher site journal article supplement (doi:10.18632/aging.204115), 2022-06-08
Supplement: Supplementary file [file aging-v14i11-204115-supplementary-material-SD5.pdf]

**Supplementary Table 4. List of 40 of 133 hub genes expressed in LINCS and used to perform gene set enrichment analysis.**

---

Symbol  
SIX5  
BAHCC1  
ATN1  
SNRNP70  
CHPF  
HIFX  
INPP5E  
PALM  
ARFGAP1  
ARHGAP33  
AGPAT2  
CAPN10  
KIFC3  
AP5Z1  
ADCK2  
ARHGEF1  
SH3TC1  
ARFRP1  
C15orf39  
ASMTL-AS1  
ARHGEF16  
CLASRP  
ANAPC2  
CCDC9  
PPP2R3B  
ALPPL2  
IGFBP1  
CA9  
CD1A  
GK2  
HCRTR2  
PDYN  
POU4F2  
SLC5A12  
KRTAP5-8  
CD5L  
CETN1  
KRT38  
PDHA2  
KRT84

---
