# Supplementary material for: Identification of biomarkers for immunotherapy response in prostate cancer and potential drugs to alleviate immunosuppression
Source: Aging (Albany NY). 2022 Jun 8;14(11):4839–57. doi: 10.18632/aging.204115 (PMC9217695; doi:10.18632/aging.204115)
Supplement: Supplementary Table 1 [file aging-14-204115-s002.xlsx]

## Sheet: go.turquoise
Supplementary Table 1. GO enrichment analysis of immune-response related genes of seven modules.
ONTOLOGY	ID	Description	GeneRatio	BgRatio	pvalue	p.adjust	qvalue	geneID	Count
GO:0034765	BP	GO:0034765	regulation of ion transmembrane transport	28/353	489/18866	1.73816e-07	0.000544566	0.000527121	SCN5A/KCNC4/KCNK6/PLCG2/KCND1/GPER1/SLC43A2/ADRA2A/CACNA1H/JPH3/JPH4/CACNA1B/GJC2/SCN1B/GPR35/KCNAB3/HAP1/KCNQ4/KCNG2/CD19/KCNH1/GRIN1/KCNK15/CACNA1G/LIME1/SLC26A5/CNIH2/KCNK12	28
GO:0070588	BP	GO:0070588	calcium ion transmembrane transport	20/353	312/18866	1.91082e-06	0.0029933	0.00289741	GRIN2D/PLCG2/SLC8A2/GPER1/GRIN3B/ADRA2A/CACNA1H/SLC24A5/JPH3/JPH4/CACNA1B/GJC2/GPR35/HAP1/CD19/CHRNA10/GRIN1/CACNA1G/LIME1/GRIN2C	20
GO:0070838	BP	GO:0070838	divalent metal ion transport	25/353	471/18866	3.16496e-06	0.0032133	0.00311036	GRIN2D/PLCG2/PDGFB/SLC8A2/GPER1/GRIN3B/ADRA2A/SLC39A3/CACNA1H/SLC39A4/SLC24A5/JPH3/JPH4/CACNA1B/GJC2/GPR35/HAP1/SLC11A1/GRM6/CD19/CHRNA10/GRIN1/CACNA1G/LIME1/GRIN2C	25
GO:0072511	BP	GO:0072511	divalent inorganic cation transport	25/353	478/18866	4.10252e-06	0.0032133	0.00311036	GRIN2D/PLCG2/PDGFB/SLC8A2/GPER1/GRIN3B/ADRA2A/SLC39A3/CACNA1H/SLC39A4/SLC24A5/JPH3/JPH4/CACNA1B/GJC2/GPR35/HAP1/SLC11A1/GRM6/CD19/CHRNA10/GRIN1/CACNA1G/LIME1/GRIN2C	25
GO:0006816	BP	GO:0006816	calcium ion transport	22/353	426/18866	1.89937e-05	0.0119014	0.0115201	GRIN2D/PLCG2/PDGFB/SLC8A2/GPER1/GRIN3B/ADRA2A/CACNA1H/SLC24A5/JPH3/JPH4/CACNA1B/GJC2/GPR35/HAP1/GRM6/CD19/CHRNA10/GRIN1/CACNA1G/LIME1/GRIN2C	22
GO:0070472	BP	GO:0070472	regulation of uterine smooth muscle contraction	4/353	10/18866	2.31488e-05	0.0120875	0.0117003	GPER1/ADRA2B/ADRA2C/OXT	4
GO:0070471	BP	GO:0070471	uterine smooth muscle contraction	4/353	11/18866	3.58401e-05	0.016041	0.0155271	GPER1/ADRA2B/ADRA2C/OXT	4
GO:0097553	BP	GO:0097553	calcium ion transmembrane import into cytosol	11/353	140/18866	6.65036e-05	0.0260445	0.0252101	GRIN2D/PLCG2/SLC8A2/GPER1/JPH3/JPH4/HAP1/CD19/GRIN1/LIME1/GRIN2C	11
GO:0015874	BP	GO:0015874	norepinephrine transport	5/353	25/18866	8.70219e-05	0.0281367	0.0272353	ADRA2A/ADRA2B/ADRA2C/SLC29A4/OXT	5
GO:0051924	BP	GO:0051924	regulation of calcium ion transport	15/353	253/18866	8.98076e-05	0.0281367	0.0272353	PLCG2/PDGFB/GPER1/GRIN3B/ADRA2A/JPH3/JPH4/CACNA1B/GJC2/GPR35/HAP1/GRM6/CD19/GRIN1/LIME1	15
GO:0051953	BP	GO:0051953	negative regulation of amine transport	5/353	27/18866	0.000128227	0.0336802	0.0326012	SLC43A2/ADRA2A/ADRA2B/ADRA2C/GRM7	5
GO:0007204	BP	GO:0007204	positive regulation of cytosolic calcium ion concentration	17/353	322/18866	0.000129002	0.0336802	0.0326012	GRIN2D/PLCG2/SLC8A2/GPER1/JPH3/GPR157/JPH4/GPR35/HAP1/CD19/CHRNA10/GRIN1/LIME1/S1PR4/GRIN2C/C5AR2/OXT	17
GO:0014061	BP	GO:0014061	regulation of norepinephrine secretion	4/353	16/18866	0.000183534	0.0422118	0.0408595	ADRA2A/ADRA2B/ADRA2C/OXT	4
GO:0060402	BP	GO:0060402	calcium ion transport into cytosol	11/353	158/18866	0.000195735	0.0422118	0.0408595	GRIN2D/PLCG2/SLC8A2/GPER1/JPH3/JPH4/HAP1/CD19/GRIN1/LIME1/GRIN2C	11
GO:1903522	BP	GO:1903522	regulation of blood circulation	16/353	303/18866	0.000202099	0.0422118	0.0408595	SCN5A/KCNK6/KCND1/ADORA3/SLC8A2/ADRA2A/CACNA1H/SLC4A3/CACNA1B/SCN1B/ADRA2B/ADRA2C/KCNG2/KCNK15/CACNA1G/OXT	16
GO:0048243	BP	GO:0048243	norepinephrine secretion	4/353	17/18866	0.000236479	0.0463056	0.0448221	ADRA2A/ADRA2B/ADRA2C/OXT	4
GO:0034703	CC	GO:0034703	cation channel complex	17/372	221/19559	1.22032e-06	0.000429552	0.000376372	SCN5A/GRIN2D/KCNC4/KCNK6/KCND1/GRIN3B/CACNA1H/CACNA1B/SCN1B/KCNAB3/KCNQ4/KCNG2/KCNH1/GRIN1/CACNA1G/CNIH2/GRIN2C	17
GO:0034702	CC	GO:0034702	ion channel complex	18/372	299/19559	1.84786e-05	0.00325224	0.0028496	SCN5A/GRIN2D/KCNC4/KCNK6/KCND1/GRIN3B/CACNA1H/SCRIB/CACNA1B/SCN1B/KCNAB3/KCNQ4/KCNG2/KCNH1/GRIN1/CACNA1G/CNIH2/GRIN2C	18
GO:0017146	CC	GO:0017146	NMDA selective glutamate receptor complex	4/372	11/19559	3.82272e-05	0.00431382	0.00377975	GRIN2D/GRIN3B/GRIN1/GRIN2C	4
GO:1902495	CC	GO:1902495	transmembrane transporter complex	18/372	322/19559	4.90207e-05	0.00431382	0.00377975	SCN5A/GRIN2D/KCNC4/KCNK6/KCND1/GRIN3B/CACNA1H/SCRIB/CACNA1B/SCN1B/KCNAB3/KCNQ4/KCNG2/KCNH1/GRIN1/CACNA1G/CNIH2/GRIN2C	18
GO:1990351	CC	GO:1990351	transporter complex	18/372	330/19559	6.72332e-05	0.00464003	0.00406558	SCN5A/GRIN2D/KCNC4/KCNK6/KCND1/GRIN3B/CACNA1H/SCRIB/CACNA1B/SCN1B/KCNAB3/KCNQ4/KCNG2/KCNH1/GRIN1/CACNA1G/CNIH2/GRIN2C	18
GO:0016323	CC	GO:0016323	basolateral plasma membrane	15/372	246/19559	7.90915e-05	0.00464003	0.00406558	PDGFB/SLC8A2/ADRA2A/PALM/SLC19A1/SCRIB/SLC29A2/SLC16A8/KCNQ4/SLC29A4/AJAP1/SLC26A1/ABCC6/SLC26A5/C5AR2	15
GO:0001518	CC	GO:0001518	voltage-gated sodium channel complex	4/372	17/19559	0.000251847	0.012544	0.010991	SCN5A/CACNA1H/SCN1B/CACNA1G	4
GO:0008328	CC	GO:0008328	ionotropic glutamate receptor complex	6/372	49/19559	0.000318766	0.012544	0.010991	GRIN2D/GRIN3B/SCRIB/GRIN1/CNIH2/GRIN2C	6
GO:0032279	CC	GO:0032279	asymmetric synapse	17/372	343/19559	0.000330774	0.012544	0.010991	BSN/GRIN2D/ABHD17A/KCND1/SLC8A2/GPER1/PALM/PICK1/ARFGAP1/ADD2/SCRIB/ADRA2C/GRM7/KCNH1/GRIN1/CNIH2/GRIN2C	17
GO:0098839	CC	GO:0098839	postsynaptic density membrane	8/372	92/19559	0.00036813	0.012544	0.010991	GRIN2D/ABHD17A/SCRIB/ADRA2C/KCNH1/GRIN1/CNIH2/GRIN2C	8
GO:0098878	CC	GO:0098878	neurotransmitter receptor complex	6/372	51/19559	0.000397644	0.012544	0.010991	GRIN2D/GRIN3B/SCRIB/GRIN1/CNIH2/GRIN2C	6
GO:0099634	CC	GO:0099634	postsynaptic specialization membrane	9/372	118/19559	0.000427637	0.012544	0.010991	GRIN2D/ABHD17A/SCRIB/ADRA2C/KCNH1/CHRNA10/GRIN1/CNIH2/GRIN2C	9
GO:0031984	CC	GO:0031984	organelle subcompartment	18/372	392/19559	0.000553897	0.0148738	0.0130324	PCSK1N/LINC00869/B4GALNT4/CHST1/CHPF/GPER1/INPP5E/B3GALT6/C2CD2L/PICK1/ATP8B3/SLC24A5/RTN2/ARFRP1/CHSY3/SCAMP5/LGR5/PCSK4	18
GO:0099572	CC	GO:0099572	postsynaptic specialization	17/372	361/19559	0.000591572	0.0148738	0.0130324	BSN/GRIN2D/ABHD17A/KCND1/SLC8A2/GPER1/PALM/PICK1/ARFGAP1/ADD2/SCRIB/ADRA2C/KCNH1/CHRNA10/GRIN1/CNIH2/GRIN2C	17
GO:0098984	CC	GO:0098984	neuron to neuron synapse	17/372	368/19559	0.000732708	0.0171574	0.0150333	BSN/GRIN2D/ABHD17A/KCND1/SLC8A2/GPER1/PALM/PICK1/ARFGAP1/ADD2/SCRIB/ADRA2C/GRM7/KCNH1/GRIN1/CNIH2/GRIN2C	17
GO:0014069	CC	GO:0014069	postsynaptic density	16/372	337/19559	0.000779882	0.0171574	0.0150333	BSN/GRIN2D/ABHD17A/KCND1/SLC8A2/GPER1/PALM/PICK1/ARFGAP1/ADD2/SCRIB/ADRA2C/KCNH1/GRIN1/CNIH2/GRIN2C	16
GO:0034706	CC	GO:0034706	sodium channel complex	4/372	26/19559	0.00138207	0.0282082	0.0247159	SCN5A/CACNA1H/SCN1B/CACNA1G	4
GO:0008076	CC	GO:0008076	voltage-gated potassium channel complex	7/372	88/19559	0.00144247	0.0282082	0.0247159	KCNC4/KCNK6/KCND1/KCNAB3/KCNQ4/KCNG2/KCNH1	7
GO:0098791	CC	GO:0098791	Golgi apparatus subcompartment	16/372	368/19559	0.00193723	0.0358896	0.0314464	PCSK1N/LINC00869/B4GALNT4/CHST1/CHPF/GPER1/INPP5E/B3GALT6/PICK1/ATP8B3/SLC24A5/ARFRP1/CHSY3/SCAMP5/LGR5/PCSK4	16
GO:0044306	CC	GO:0044306	neuron projection terminus	9/372	149/19559	0.0022348	0.0393325	0.034463	BSN/KCNC4/SLC8A2/GPER1/CABP4/ADRA2C/PACSIN1/GRIN1/OXT	9
GO:0034705	CC	GO:0034705	potassium channel complex	7/372	96/19559	0.00238076	0.039906	0.0349655	KCNC4/KCNK6/KCND1/KCNAB3/KCNQ4/KCNG2/KCNH1	7
GO:0005244	MF	GO:0005244	voltage-gated ion channel activity	18/359	197/18352	6.69337e-08	1.41161e-05	1.20419e-05	SCN5A/GRIN2D/KCNC4/KCNK6/KCND1/GRIN3B/CACNA1H/CACNA1B/SCN1B/KCNAB3/KCNQ4/KCNG2/KCNH1/GRIN1/CACNA1G/KCNT1/GRIN2C/KCNK12	18
GO:0022832	MF	GO:0022832	voltage-gated channel activity	18/359	197/18352	6.69337e-08	1.41161e-05	1.20419e-05	SCN5A/GRIN2D/KCNC4/KCNK6/KCND1/GRIN3B/CACNA1H/CACNA1B/SCN1B/KCNAB3/KCNQ4/KCNG2/KCNH1/GRIN1/CACNA1G/KCNT1/GRIN2C/KCNK12	18
GO:0046873	MF	GO:0046873	metal ion transmembrane transporter activity	27/359	428/18352	1.00947e-07	1.41161e-05	1.20419e-05	SCN5A/GRIN2D/KCNC4/KCNK6/KCND1/SLC8A2/SLC12A9/GRIN3B/SLC39A3/CACNA1H/SLC39A4/SLC24A5/CACNA1B/SCN1B/ASIC3/KCNAB3/SLC11A1/KCNQ4/KCNG2/KCNH1/CHRNA10/GRIN1/KCNK15/CACNA1G/KCNT1/GRIN2C/KCNK12	27
GO:0022843	MF	GO:0022843	voltage-gated cation channel activity	15/359	140/18352	1.04952e-07	1.41161e-05	1.20419e-05	GRIN2D/KCNC4/KCNK6/KCND1/GRIN3B/CACNA1H/CACNA1B/KCNAB3/KCNQ4/KCNG2/KCNH1/GRIN1/CACNA1G/KCNT1/GRIN2C	15
GO:0005261	MF	GO:0005261	cation channel activity	22/359	334/18352	7.71529e-07	8.03596e-05	6.85518e-05	SCN5A/GRIN2D/KCNC4/KCNK6/KCND1/GRIN3B/CACNA1H/SLC24A5/CACNA1B/SCN1B/ASIC3/KCNAB3/KCNQ4/KCNG2/KCNH1/CHRNA10/GRIN1/KCNK15/CACNA1G/KCNT1/GRIN2C/KCNK12	22
GO:0022836	MF	GO:0022836	gated channel activity	22/359	337/18352	8.96204e-07	8.03596e-05	6.85518e-05	SCN5A/GRIN2D/KCNC4/KCNK6/KCND1/ANO8/GRIN3B/CACNA1H/ANO7/CACNA1B/SCN1B/ASIC3/KCNAB3/KCNQ4/KCNG2/KCNH1/CHRNA10/GRIN1/CACNA1G/KCNT1/GRIN2C/KCNK12	22
GO:0015267	MF	GO:0015267	channel activity	26/359	479/18352	2.97993e-06	0.000208139	0.000177555	SCN5A/GRIN2D/KCNC4/KCNK6/KCND1/ANO8/GRIN3B/CACNA1H/ANO7/SLC24A5/CACNA1B/GJC2/SCN1B/ASIC3/KCNAB3/KCNQ4/PANX2/KCNG2/KCNH1/CHRNA10/GRIN1/KCNK15/CACNA1G/KCNT1/GRIN2C/KCNK12	26
GO:0022803	MF	GO:0022803	passive transmembrane transporter activity	26/359	480/18352	3.095e-06	0.000208139	0.000177555	SCN5A/GRIN2D/KCNC4/KCNK6/KCND1/ANO8/GRIN3B/CACNA1H/ANO7/SLC24A5/CACNA1B/GJC2/SCN1B/ASIC3/KCNAB3/KCNQ4/PANX2/KCNG2/KCNH1/CHRNA10/GRIN1/KCNK15/CACNA1G/KCNT1/GRIN2C/KCNK12	26
GO:0005216	MF	GO:0005216	ion channel activity	24/359	431/18352	4.68194e-06	0.000279876	0.000238752	SCN5A/GRIN2D/KCNC4/KCNK6/KCND1/ANO8/GRIN3B/CACNA1H/ANO7/SLC24A5/CACNA1B/SCN1B/ASIC3/KCNAB3/KCNQ4/KCNG2/KCNH1/CHRNA10/GRIN1/KCNK15/CACNA1G/KCNT1/GRIN2C/KCNK12	24
GO:0008066	MF	GO:0008066	glutamate receptor activity	6/359	27/18352	1.12381e-05	0.000604609	0.000515769	GRIN2D/GRIN3B/GRM7/GRM6/GRIN1/GRIN2C	6
GO:0015297	MF	GO:0015297	antiporter activity	9/359	83/18352	3.48835e-05	0.00170612	0.00145543	SLC8A2/SLC19A1/SLC4A3/SLC24A5/SLC35E4/SLC11A1/SLC25A10/SLC26A1/SLC26A5	9
GO:0008514	MF	GO:0008514	organic anion transmembrane transporter activity	15/359	233/18352	5.81599e-05	0.00243742	0.00207927	SLC52A2/SLC25A45/SLC43A2/SLC25A22/SLC19A1/SLC4A3/ASIC3/SLC16A8/SLC25A10/SLC16A5/SLC2A6/SLC26A1/SLC26A5/SLC25A2/SLC7A5P1	15
GO:0015079	MF	GO:0015079	potassium ion transmembrane transporter activity	12/359	156/18352	5.88967e-05	0.00243742	0.00207927	KCNC4/KCNK6/KCND1/SLC12A9/SLC24A5/KCNAB3/KCNQ4/KCNG2/KCNH1/KCNK15/KCNT1/KCNK12	12
GO:0008509	MF	GO:0008509	anion transmembrane transporter activity	19/359	357/18352	8.4458e-05	0.00304249	0.00259543	SLC52A2/SLC25A45/ANO8/SLC12A9/SLC43A2/SLC25A22/ANO7/SLC19A1/SLC4A3/SLC24A5/ASIC3/SLC16A8/SLC25A10/SLC16A5/SLC2A6/SLC26A1/SLC26A5/SLC25A2/SLC7A5P1	19
GO:0072509	MF	GO:0072509	divalent inorganic cation transmembrane transporter activity	12/359	162/18352	8.48277e-05	0.00304249	0.00259543	GRIN2D/SLC8A2/GRIN3B/SLC39A3/CACNA1H/SLC39A4/SLC24A5/CACNA1B/CHRNA10/GRIN1/CACNA1G/GRIN2C	12
GO:0005267	MF	GO:0005267	potassium channel activity	10/359	120/18352	0.00012489	0.00419942	0.00358237	KCNC4/KCNK6/KCND1/KCNAB3/KCNQ4/KCNG2/KCNH1/KCNK15/KCNT1/KCNK12	10
GO:0015077	MF	GO:0015077	monovalent inorganic cation transmembrane transporter activity	19/359	381/18352	0.000196132	0.006207	0.00529496	SCN5A/KCNC4/KCNK6/KCND1/SLC8A2/SLC12A9/CACNA1H/SLC24A5/SCN1B/ASIC3/KCNAB3/SLC11A1/KCNQ4/KCNG2/KCNH1/KCNK15/CACNA1G/KCNT1/KCNK12	19
GO:0015085	MF	GO:0015085	calcium ion transmembrane transporter activity	10/359	134/18352	0.000308401	0.00921775	0.00786331	GRIN2D/SLC8A2/GRIN3B/CACNA1H/SLC24A5/CACNA1B/CHRNA10/GRIN1/CACNA1G/GRIN2C	10
GO:0005249	MF	GO:0005249	voltage-gated potassium channel activity	8/359	88/18352	0.0003268	0.00925361	0.00789391	KCNC4/KCNK6/KCND1/KCNAB3/KCNQ4/KCNG2/KCNH1/KCNT1	8
GO:0005342	MF	GO:0005342	organic acid transmembrane transporter activity	11/359	163/18352	0.000373719	0.010053	0.00857586	SLC43A2/SLC25A22/SLC19A1/SLC16A8/SLC25A10/SLC16A5/SLC29A4/SLC26A1/SLC26A5/SLC25A2/SLC7A5P1	11
GO:0004970	MF	GO:0004970	ionotropic glutamate receptor activity	4/359	19/18352	0.000442293	0.0113311	0.00966616	GRIN2D/GRIN3B/GRIN1/GRIN2C	4
GO:0005262	MF	GO:0005262	calcium channel activity	9/359	118/18352	0.000521897	0.0127628	0.0108874	GRIN2D/GRIN3B/CACNA1H/SLC24A5/CACNA1B/CHRNA10/GRIN1/CACNA1G/GRIN2C	9
GO:0017049	MF	GO:0017049	GTP-Rho binding	4/359	22/18352	0.000796934	0.0178754	0.0152489	CDC42EP1/C15orf62/CDC42EP5/PKN3	4
GO:0015291	MF	GO:0015291	secondary active transmembrane transporter activity	13/359	236/18352	0.000797417	0.0178754	0.0152489	SLC8A2/SLC12A9/SLC25A22/SLC19A1/SLC4A3/SLC24A5/SLC16A8/SLC35E4/SLC11A1/SLC25A10/SLC16A5/SLC26A1/SLC26A5	13
GO:0005310	MF	GO:0005310	dicarboxylic acid transmembrane transporter activity	5/359	39/18352	0.000928488	0.0196566	0.0167683	SLC25A22/SLC19A1/SLC25A10/SLC26A1/SLC26A5	5
GO:0005248	MF	GO:0005248	voltage-gated sodium channel activity	4/359	23/18352	0.000949946	0.0196566	0.0167683	SCN5A/CACNA1H/SCN1B/CACNA1G	4
GO:0046943	MF	GO:0046943	carboxylic acid transmembrane transporter activity	10/359	162/18352	0.00135254	0.0269507	0.0229906	SLC43A2/SLC25A22/SLC19A1/SLC16A8/SLC25A10/SLC16A5/SLC26A1/SLC26A5/SLC25A2/SLC7A5P1	10
GO:0005272	MF	GO:0005272	sodium channel activity	5/359	44/18352	0.00161713	0.0310721	0.0265064	SCN5A/CACNA1H/SCN1B/ASIC3/CACNA1G	5
GO:0015301	MF	GO:0015301	anion:anion antiporter activity	4/359	28/18352	0.00203383	0.0364733	0.031114	SLC19A1/SLC4A3/SLC26A1/SLC26A5	4
GO:0140323	MF	GO:0140323	solute:anion antiporter activity	4/359	28/18352	0.00203383	0.0364733	0.031114	SLC19A1/SLC4A3/SLC26A1/SLC26A5	4
GO:0008376	MF	GO:0008376	acetylgalactosaminyltransferase activity	5/359	47/18352	0.00217765	0.0377927	0.0322395	B4GALNT4/CHPF/CHSY3/B3GALT5/B4GALNT1	5
GO:1901338	MF	GO:1901338	catecholamine binding	3/359	14/18352	0.00230186	0.0386999	0.0330135	ADRA2A/ADRA2B/ADRA2C	3

## Sheet: go.cyan
ONTOLOGY	ID	Description	GeneRatio	BgRatio	pvalue	p.adjust	qvalue	geneID	Count
GO:0015370	MF	GO:0015370	solute:sodium symporter activity	0.16	72/18352	2.58808e-06	0.000196694	0.000108972	SLC4A9/SLC13A1/SLC5A5/SLC1A6	4
GO:0015294	MF	GO:0015294	solute:cation symporter activity	0.16	98/18352	8.87326e-06	0.000337184	0.000186805	SLC4A9/SLC13A1/SLC5A5/SLC1A6	4
GO:0015293	MF	GO:0015293	symporter activity	0.16	143/18352	3.93682e-05	0.000949385	0.000525975	SLC4A9/SLC13A1/SLC5A5/SLC1A6	4
GO:0015081	MF	GO:0015081	sodium ion transmembrane transporter activity	0.16	152/18352	4.99676e-05	0.000949385	0.000525975	SLC4A9/SLC13A1/SLC5A5/SLC1A6	4
GO:0015373	MF	GO:0015373	anion:sodium symporter activity	0.08	14/18352	0.000160507	0.00243971	0.00135164	SLC13A1/SLC5A5	2
GO:0022853	MF	GO:0022853	active ion transmembrane transporter activity	0.16	229/18352	0.000243124	0.00296075	0.0016403	SLC4A9/SLC13A1/SLC5A5/SLC1A6	4
GO:0015291	MF	GO:0015291	secondary active transmembrane transporter activity	0.16	236/18352	0.0002727	0.00296075	0.0016403	SLC4A9/SLC13A1/SLC5A5/SLC1A6	4
GO:0015296	MF	GO:0015296	anion:cation symporter activity	0.08	22/18352	0.000404728	0.00384492	0.00213015	SLC13A1/SLC5A5	2
GO:0015103	MF	GO:0015103	inorganic anion transmembrane transporter activity	0.12	145/18352	0.000978144	0.00825988	0.00457611	SLC4A9/SLC13A1/SLC5A5	3
GO:0022804	MF	GO:0022804	active transmembrane transporter activity	0.16	344/18352	0.00112392	0.00854178	0.00473229	SLC4A9/SLC13A1/SLC5A5/SLC1A6	4
GO:0008509	MF	GO:0008509	anion transmembrane transporter activity	0.16	357/18352	0.00128905	0.00890618	0.00493417	SLC4A9/SLC13A1/SLC5A5/SLC1A6	4
GO:0015077	MF	GO:0015077	monovalent inorganic cation transmembrane transporter activity	0.16	381/18352	0.00163755	0.0103712	0.0057458	SLC4A9/SLC13A1/SLC5A5/SLC1A6	4
GO:0004984	MF	GO:0004984	olfactory receptor activity	0.16	427/18352	0.00248093	0.0135825	0.00752491	OR4E2/OR2T35/OR1E2/OR2A12	4
GO:0046873	MF	GO:0046873	metal ion transmembrane transporter activity	0.16	428/18352	0.00250203	0.0135825	0.00752491	SLC4A9/SLC13A1/SLC5A5/SLC1A6	4

## Sheet: go.green
ONTOLOGY	ID	Description	GeneRatio	BgRatio	pvalue	p.adjust	qvalue	geneID	Count
GO:0050911	BP	GO:0050911	detection of chemical stimulus involved in sensory perception of smell	11/91	427/18866	6.53653e-06	0.0075889	0.00739853	OR5H6/OR2A14/OR56B4/OR2J2/OR5T1/OR2B11/OR4D6/OR51L1/OR1I1/OR5M9/OR8B3	11
GO:0007608	BP	GO:0007608	sensory perception of smell	11/91	452/18866	1.11604e-05	0.0075889	0.00739853	OR5H6/OR2A14/OR56B4/OR2J2/OR5T1/OR2B11/OR4D6/OR51L1/OR1I1/OR5M9/OR8B3	11
GO:0050907	BP	GO:0050907	detection of chemical stimulus involved in sensory perception	11/91	472/18866	1.66986e-05	0.0075889	0.00739853	OR5H6/OR2A14/OR56B4/OR2J2/OR5T1/OR2B11/OR4D6/OR51L1/OR1I1/OR5M9/OR8B3	11
GO:0006813	BP	GO:0006813	potassium ion transport	8/91	242/18866	2.21898e-05	0.0075889	0.00739853	KCNA7/P2RY12/KCNH7/KCNA10/CCT8L2/SLC9C1/ADORA1/KCNK18	8
GO:0042391	BP	GO:0042391	regulation of membrane potential	10/91	443/18866	5.4207e-05	0.014831	0.014459	SLC4A8/KCNH7/SCN2B/SCN2A/GRIN2A/SLC17A7/CACNA1A/HTR3E/ADORA1/KCNK18	10
GO:0071805	BP	GO:0071805	potassium ion transmembrane transport	7/91	218/18866	8.88588e-05	0.0202598	0.0197516	KCNA7/P2RY12/KCNH7/KCNA10/CCT8L2/SLC9C1/KCNK18	7
GO:0070268	BP	GO:0070268	cornification	5/91	113/18866	0.000217695	0.0425438	0.0414766	KRT38/KRT78/KRT74/KRT39/KRT84	5
GO:0005882	CC	GO:0005882	intermediate filament	7/94	215/19559	8.0118e-05	0.00789847	0.0072123	GFAP/KRT38/KRT78/KRT74/KRT39/KRTAP1-5/KRT84	7
GO:0034703	CC	GO:0034703	cation channel complex	7/94	221/19559	9.51623e-05	0.00789847	0.0072123	KCNA7/SCN2B/SCN2A/GRIN2A/KCNA10/CACNA1A/CACNG6	7
GO:0045111	CC	GO:0045111	intermediate filament cytoskeleton	7/94	251/19559	0.000208883	0.0115582	0.0105541	GFAP/KRT38/KRT78/KRT74/KRT39/KRTAP1-5/KRT84	7
GO:0034702	CC	GO:0034702	ion channel complex	7/94	299/19559	0.000598438	0.0248352	0.0226776	KCNA7/SCN2B/SCN2A/GRIN2A/KCNA10/CACNA1A/CACNG6	7
GO:1902495	CC	GO:1902495	transmembrane transporter complex	7/94	322/19559	0.000924389	0.0270451	0.0246956	KCNA7/SCN2B/SCN2A/GRIN2A/KCNA10/CACNA1A/CACNG6	7
GO:1990351	CC	GO:1990351	transporter complex	7/94	330/19559	0.0010659	0.0270451	0.0246956	KCNA7/SCN2B/SCN2A/GRIN2A/KCNA10/CACNA1A/CACNG6	7
GO:0045095	CC	GO:0045095	keratin filament	4/94	95/19559	0.00114046	0.0270451	0.0246956	KRT78/KRT74/KRTAP1-5/KRT84	4
GO:0005216	MF	GO:0005216	ion channel activity	15/82	431/18352	6.78002e-10	1.43736e-07	1.04912e-07	KCNA7/KCNH7/SCN2B/SCN2A/GRIN2A/SLC17A7/KCNA10/CACNA1A/CCT8L2/CACNG6/SLC9C1/SLC26A7/HTR3E/KCNK18/OTOP1	15
GO:0015267	MF	GO:0015267	channel activity	15/82	479/18352	2.86581e-09	2.08321e-07	1.52052e-07	KCNA7/KCNH7/SCN2B/SCN2A/GRIN2A/SLC17A7/KCNA10/CACNA1A/CCT8L2/CACNG6/SLC9C1/SLC26A7/HTR3E/KCNK18/OTOP1	15
GO:0022803	MF	GO:0022803	passive transmembrane transporter activity	15/82	480/18352	2.94794e-09	2.08321e-07	1.52052e-07	KCNA7/KCNH7/SCN2B/SCN2A/GRIN2A/SLC17A7/KCNA10/CACNA1A/CCT8L2/CACNG6/SLC9C1/SLC26A7/HTR3E/KCNK18/OTOP1	15
GO:0005261	MF	GO:0005261	cation channel activity	12/82	334/18352	2.87054e-08	1.34299e-06	9.80237e-07	KCNA7/KCNH7/SCN2B/SCN2A/GRIN2A/KCNA10/CACNA1A/CCT8L2/CACNG6/HTR3E/KCNK18/OTOP1	12
GO:0022836	MF	GO:0022836	gated channel activity	12/82	337/18352	3.16743e-08	1.34299e-06	9.80237e-07	KCNA7/KCNH7/SCN2B/SCN2A/GRIN2A/SLC17A7/KCNA10/CACNA1A/CCT8L2/CACNG6/HTR3E/KCNK18	12
GO:0046873	MF	GO:0046873	metal ion transmembrane transporter activity	13/82	428/18352	5.21555e-08	1.84283e-06	1.34506e-06	KCNA7/SLC4A8/KCNH7/SCN2B/SCN2A/GRIN2A/SLC17A7/KCNA10/CACNA1A/CCT8L2/CACNG6/SLC9C1/KCNK18	13
GO:0005244	MF	GO:0005244	voltage-gated ion channel activity	9/82	197/18352	2.34978e-07	6.22692e-06	4.54497e-06	KCNA7/KCNH7/SCN2B/SCN2A/GRIN2A/KCNA10/CACNA1A/CACNG6/KCNK18	9
GO:0022832	MF	GO:0022832	voltage-gated channel activity	9/82	197/18352	2.34978e-07	6.22692e-06	4.54497e-06	KCNA7/KCNH7/SCN2B/SCN2A/GRIN2A/KCNA10/CACNA1A/CACNG6/KCNK18	9
GO:0015077	MF	GO:0015077	monovalent inorganic cation transmembrane transporter activity	11/82	381/18352	1.00041e-06	2.35651e-05	1.72e-05	KCNA7/SLC4A8/KCNH7/SCN2B/SCN2A/SLC17A7/KCNA10/CCT8L2/SLC9C1/KCNK18/OTOP1	11
GO:0004984	MF	GO:0004984	olfactory receptor activity	11/82	427/18352	3.01953e-06	5.88177e-05	4.29305e-05	OR5H6/OR2A14/OR56B4/OR2J2/OR5T1/OR2B11/OR4D6/OR51L1/OR1I1/OR5M9/OR8B3	11
GO:0022843	MF	GO:0022843	voltage-gated cation channel activity	7/82	140/18352	3.05186e-06	5.88177e-05	4.29305e-05	KCNA7/KCNH7/GRIN2A/KCNA10/CACNA1A/CACNG6/KCNK18	7
GO:0015079	MF	GO:0015079	potassium ion transmembrane transporter activity	6/82	156/18352	7.04373e-05	0.00124439	0.00090827	KCNA7/KCNH7/KCNA10/CCT8L2/SLC9C1/KCNK18	6
GO:0005267	MF	GO:0005267	potassium channel activity	5/82	120/18352	0.000200721	0.0032733	0.00238915	KCNA7/KCNH7/KCNA10/CCT8L2/KCNK18	5
GO:0015081	MF	GO:0015081	sodium ion transmembrane transporter activity	5/82	152/18352	0.000596197	0.00902812	0.00658954	SLC4A8/SCN2B/SCN2A/SLC17A7/SLC9C1	5
GO:0005249	MF	GO:0005249	voltage-gated potassium channel activity	4/82	88/18352	0.000649191	0.00917523	0.00669691	KCNA7/KCNH7/KCNA10/KCNK18	4
GO:0016813	MF	GO:0016813	hydrolase activity, acting on carbon-nitrogen (but not peptide) bonds, in linear amidines	2/82	11/18352	0.00105671	0.0140014	0.0102195	PADI1/AGMAT	2
GO:0015269	MF	GO:0015269	calcium-activated potassium channel activity	2/82	12/18352	0.00126438	0.0157675	0.0115086	CCT8L2/KCNK18	2
GO:0030594	MF	GO:0030594	neurotransmitter receptor activity	4/82	111/18352	0.00154285	0.0181714	0.0132631	GRIN2A/HTR1F/HTR3E/ADORA1	4
GO:0015276	MF	GO:0015276	ligand-gated ion channel activity	4/82	139/18352	0.00349149	0.0370097	0.0270131	GRIN2A/SLC17A7/KCNA10/HTR3E	4
GO:0022834	MF	GO:0022834	ligand-gated channel activity	4/82	139/18352	0.00349149	0.0370097	0.0270131	GRIN2A/SLC17A7/KCNA10/HTR3E	4
GO:0015106	MF	GO:0015106	bicarbonate transmembrane transporter activity	2/82	21/18352	0.00391947	0.0391181	0.0285519	SLC4A8/SLC26A7	2
GO:0015103	MF	GO:0015103	inorganic anion transmembrane transporter activity	4/82	145/18352	0.00405942	0.0391181	0.0285519	SLC4A8/SLC17A7/CCT8L2/SLC26A7	4
GO:0005230	MF	GO:0005230	extracellular ligand-gated ion channel activity	3/82	74/18352	0.00443645	0.0408925	0.029847	GRIN2A/SLC17A7/HTR3E	3
GO:0005248	MF	GO:0005248	voltage-gated sodium channel activity	2/82	23/18352	0.0046948	0.0414707	0.0302691	SCN2B/SCN2A	2
GO:0008509	MF	GO:0008509	anion transmembrane transporter activity	6/82	357/18352	0.00526304	0.0446306	0.0325755	SLC4A8/SLC7A14/SLC17A7/CCT8L2/SLC9C1/SLC26A7	6
GO:0005227	MF	GO:0005227	calcium activated cation channel activity	2/82	25/18352	0.00553487	0.0451304	0.0329403	CCT8L2/KCNK18	2
GO:0015297	MF	GO:0015297	antiporter activity	3/82	83/18352	0.00611019	0.0479763	0.0350174	SLC4A8/SLC9C1/SLC26A7	3
GO:0015301	MF	GO:0015301	anion:anion antiporter activity	2/82	28/18352	0.00691377	0.0491805	0.0358964	SLC4A8/SLC26A7	2
GO:0140323	MF	GO:0140323	solute:anion antiporter activity	2/82	28/18352	0.00691377	0.0491805	0.0358964	SLC4A8/SLC26A7	2
GO:0005253	MF	GO:0005253	anion channel activity	3/82	87/18352	0.00695951	0.0491805	0.0358964	SLC17A7/CCT8L2/SLC26A7	3

## Sheet: go.magenta
ONTOLOGY	ID	Description	GeneRatio	BgRatio	pvalue	p.adjust	qvalue	geneID	Count
GO:0006814	BP	GO:0006814	sodium ion transport	7/58	241/18866	8.78573e-06	0.00240461	0.00211627	SLC6A17/SLC5A12/SCN10A/CACNA1I/ATP4A/ATP4B/ATP1A3	7
GO:0010248	BP	GO:0010248	establishment or maintenance of transmembrane electrochemical gradient	3/58	14/18866	9.79871e-06	0.00240461	0.00211627	ATP4A/ATP4B/ATP1A3	3
GO:0030007	BP	GO:0030007	cellular potassium ion homeostasis	3/58	14/18866	9.79871e-06	0.00240461	0.00211627	ATP4A/ATP4B/ATP1A3	3
GO:0036376	BP	GO:0036376	sodium ion export across plasma membrane	3/58	15/18866	1.22216e-05	0.00240461	0.00211627	ATP4A/ATP4B/ATP1A3	3
GO:0035725	BP	GO:0035725	sodium ion transmembrane transport	6/58	174/18866	1.53585e-05	0.00241742	0.00212755	SLC6A17/SCN10A/CACNA1I/ATP4A/ATP4B/ATP1A3	6
GO:0006883	BP	GO:0006883	cellular sodium ion homeostasis	3/58	18/18866	2.17751e-05	0.00285616	0.00251368	ATP4A/ATP4B/ATP1A3	3
GO:0140115	BP	GO:0140115	export across plasma membrane	4/58	62/18866	3.92749e-05	0.00441563	0.00388615	KCNE1/ATP4A/ATP4B/ATP1A3	4
GO:0055075	BP	GO:0055075	potassium ion homeostasis	3/58	29/18866	9.51922e-05	0.00936453	0.00824164	ATP4A/ATP4B/ATP1A3	3
GO:0050911	BP	GO:0050911	detection of chemical stimulus involved in sensory perception of smell	7/58	427/18866	0.000321844	0.0254617	0.0224086	OR2H2/OR52M1/OR2K2/OR4A47/OR8B12/OR1S2/OR10J5	7
GO:0030216	BP	GO:0030216	keratinocyte differentiation	6/58	306/18866	0.000345442	0.0254617	0.0224086	SERPINB13/IVL/KRTAP5-8/KRTAP24-1/ABCA12/KRTAP10-4	6
GO:0042391	BP	GO:0042391	regulation of membrane potential	7/58	443/18866	0.00040157	0.0254617	0.0224086	KCNE1/CHRNE/GRID2/CHRNA9/SCN10A/CACNA1I/ATP1A3	7
GO:0035637	BP	GO:0035637	multicellular organismal signaling	5/58	206/18866	0.000423493	0.0254617	0.0224086	KCNE1/ATP2B2/SCN10A/CACNA1I/ATP1A3	5
GO:1990573	BP	GO:1990573	potassium ion import across plasma membrane	3/58	48/18866	0.000432296	0.0254617	0.0224086	ATP4A/ATP4B/ATP1A3	3
GO:0007608	BP	GO:0007608	sensory perception of smell	7/58	452/18866	0.000452939	0.0254617	0.0224086	OR2H2/OR52M1/OR2K2/OR4A47/OR8B12/OR1S2/OR10J5	7
GO:0055078	BP	GO:0055078	sodium ion homeostasis	3/58	52/18866	0.000547574	0.0287294	0.0252845	ATP4A/ATP4B/ATP1A3	3
GO:0050907	BP	GO:0050907	detection of chemical stimulus involved in sensory perception	7/58	472/18866	0.000586018	0.0288247	0.0253684	OR2H2/OR52M1/OR2K2/OR4A47/OR8B12/OR1S2/OR10J5	7
GO:0031424	BP	GO:0031424	keratinization	5/58	225/18866	0.000632398	0.0292763	0.0257658	IVL/KRTAP5-8/KRTAP24-1/ABCA12/KRTAP10-4	5
GO:0009913	BP	GO:0009913	epidermal cell differentiation	6/58	365/18866	0.000872612	0.0381525	0.0335777	SERPINB13/IVL/KRTAP5-8/KRTAP24-1/ABCA12/KRTAP10-4	6
GO:0061337	BP	GO:0061337	cardiac conduction	4/58	148/18866	0.00111052	0.0459987	0.040483	KCNE1/ATP2B2/SCN10A/ATP1A3	4
GO:0007605	BP	GO:0007605	sensory perception of sound	4/58	152/18866	0.00122567	0.0482299	0.0424467	KCNE1/ATP2B2/POU4F2/CHRNA9	4
GO:1902495	CC	GO:1902495	transmembrane transporter complex	8/61	322/19559	6.82285e-06	0.000554947	0.000438116	KCNE1/CHRNE/GRID2/CHRNA9/SCN10A/CACNA1I/ATP4B/ATP1A3	8
GO:1990351	CC	GO:1990351	transporter complex	8/61	330/19559	8.16099e-06	0.000554947	0.000438116	KCNE1/CHRNE/GRID2/CHRNA9/SCN10A/CACNA1I/ATP4B/ATP1A3	8
GO:0034702	CC	GO:0034702	ion channel complex	6/61	299/19559	0.000332715	0.0150831	0.0119077	KCNE1/CHRNE/GRID2/CHRNA9/SCN10A/CACNA1I	6
GO:0099634	CC	GO:0099634	postsynaptic specialization membrane	4/61	118/19559	0.00050386	0.016834	0.01329	ATP2B2/CHRNE/GRID2/CHRNA9	4
GO:0005890	CC	GO:0005890	sodium:potassium-exchanging ATPase complex	2/61	12/19559	0.000618898	0.016834	0.01329	ATP4B/ATP1A3	2
GO:0005892	CC	GO:0005892	acetylcholine-gated channel complex	2/61	16/19559	0.00111627	0.0187515	0.0148038	CHRNE/CHRNA9	2
GO:0001518	CC	GO:0001518	voltage-gated sodium channel complex	2/61	17/19559	0.00126256	0.0187515	0.0148038	SCN10A/CACNA1I	2
GO:0042599	CC	GO:0042599	lamellar body	2/61	17/19559	0.00126256	0.0187515	0.0148038	ABCA12/SFTPC	2
GO:0099699	CC	GO:0099699	integral component of synaptic membrane	4/61	154/19559	0.00136114	0.0187515	0.0148038	CHRNE/GRID2/CHRNA9/SCN10A	4
GO:0090533	CC	GO:0090533	cation-transporting ATPase complex	2/61	18/19559	0.00141754	0.0187515	0.0148038	ATP4B/ATP1A3	2
GO:0099060	CC	GO:0099060	integral component of postsynaptic specialization membrane	3/61	74/19559	0.00159844	0.0187515	0.0148038	CHRNE/GRID2/CHRNA9	3
GO:0098948	CC	GO:0098948	intrinsic component of postsynaptic specialization membrane	3/61	77/19559	0.00179183	0.0187515	0.0148038	CHRNE/GRID2/CHRNA9	3
GO:0099240	CC	GO:0099240	intrinsic component of synaptic membrane	4/61	166/19559	0.00179242	0.0187515	0.0148038	CHRNE/GRID2/CHRNA9/SCN10A	4
GO:0097381	CC	GO:0097381	photoreceptor disc membrane	2/61	24/19559	0.00252654	0.0229073	0.0180847	PDE6A/GRK7	2
GO:0098533	CC	GO:0098533	ATPase dependent transmembrane transport complex	2/61	24/19559	0.00252654	0.0229073	0.0180847	ATP4B/ATP1A3	2
GO:0034706	CC	GO:0034706	sodium channel complex	2/61	26/19559	0.0029632	0.0251872	0.0198846	SCN10A/CACNA1I	2
GO:0045095	CC	GO:0045095	keratin filament	3/61	95/19559	0.0032585	0.026068	0.02058	KRTAP5-8/KRTAP24-1/KRTAP10-4	3
GO:0097733	CC	GO:0097733	photoreceptor cell cilium	3/61	117/19559	0.00583438	0.0417619	0.0329699	PDE6A/GRK7/CETN1	3
GO:0099055	CC	GO:0099055	integral component of postsynaptic membrane	3/61	117/19559	0.00583438	0.0417619	0.0329699	CHRNE/GRID2/CHRNA9	3
GO:0098936	CC	GO:0098936	intrinsic component of postsynaptic membrane	3/61	122/19559	0.0065495	0.0445366	0.0351605	CHRNE/GRID2/CHRNA9	3
GO:0097060	CC	GO:0097060	synaptic membrane	5/61	387/19559	0.00709802	0.0459681	0.0362906	ATP2B2/CHRNE/GRID2/CHRNA9/SCN10A	5
GO:0015662	MF	GO:0015662	ion transmembrane transporter activity, phosphorylative mechanism	4/61	33/18352	4.20524e-06	0.000345726	0.000264137	ATP2B2/ATP4A/ATP4B/ATP1A3	4
GO:0005391	MF	GO:0005391	sodium:potassium-exchanging ATPase activity	3/61	11/18352	5.65711e-06	0.000345726	0.000264137	ATP4A/ATP4B/ATP1A3	3
GO:0008556	MF	GO:0008556	potassium transmembrane transporter activity, phosphorylative mechanism	3/61	11/18352	5.65711e-06	0.000345726	0.000264137	ATP4A/ATP4B/ATP1A3	3
GO:0008554	MF	GO:0008554	sodium transmembrane transporter activity, phosphorylative mechanism	3/61	12/18352	7.52495e-06	0.000345726	0.000264137	ATP4A/ATP4B/ATP1A3	3
GO:0046873	MF	GO:0046873	metal ion transmembrane transporter activity	9/61	428/18352	1.11178e-05	0.000345726	0.000264137	KCNE1/ATP2B2/SLC5A12/CHRNA9/SCN10A/CACNA1I/ATP4A/ATP4B/ATP1A3	9
GO:0015081	MF	GO:0015081	sodium ion transmembrane transporter activity	6/61	152/18352	1.11525e-05	0.000345726	0.000264137	SLC5A12/SCN10A/CACNA1I/ATP4A/ATP4B/ATP1A3	6
GO:0042626	MF	GO:0042626	ATPase-coupled transmembrane transporter activity	5/61	100/18352	2.0288e-05	0.000539082	0.000411862	ATP2B2/ATP4A/ATP4B/ABCA12/ATP1A3	5
GO:0015399	MF	GO:0015399	primary active transmembrane transporter activity	5/61	107/18352	2.81426e-05	0.000637553	0.000487095	ATP2B2/ATP4A/ATP4B/ABCA12/ATP1A3	5
GO:0019829	MF	GO:0019829	ATPase-coupled cation transmembrane transporter activity	4/61	54/18352	3.08493e-05	0.000637553	0.000487095	ATP2B2/ATP4A/ATP4B/ATP1A3	4
GO:0042625	MF	GO:0042625	ATPase-coupled ion transmembrane transporter activity	4/61	58/18352	4.09777e-05	0.000762184	0.000582314	ATP2B2/ATP4A/ATP4B/ATP1A3	4
GO:0022804	MF	GO:0022804	active transmembrane transporter activity	7/61	344/18352	0.000139945	0.00236635	0.00180791	ATP2B2/SLC6A17/SLC5A12/ATP4A/ATP4B/ABCA12/ATP1A3	7
GO:0015077	MF	GO:0015077	monovalent inorganic cation transmembrane transporter activity	7/61	381/18352	0.000261607	0.0040549	0.00309797	KCNE1/SLC5A12/SCN10A/CACNA1I/ATP4A/ATP4B/ATP1A3	7
GO:0030594	MF	GO:0030594	neurotransmitter receptor activity	4/61	111/18352	0.000507301	0.00643625	0.00491734	CHRNE/GRID2/CHRNA9/OR10J5	4
GO:1904315	MF	GO:1904315	transmitter-gated ion channel activity involved in regulation of postsynaptic membrane potential	3/61	47/18352	0.000510539	0.00643625	0.00491734	CHRNE/GRID2/CHRNA9	3
GO:0004984	MF	GO:0004984	olfactory receptor activity	7/61	427/18352	0.000519052	0.00643625	0.00491734	OR2H2/OR52M1/OR2K2/OR4A47/OR8B12/OR1S2/OR10J5	7
GO:0099529	MF	GO:0099529	neurotransmitter receptor activity involved in regulation of postsynaptic membrane potential	3/61	50/18352	0.000612763	0.00712336	0.0054423	CHRNE/GRID2/CHRNA9	3
GO:0022836	MF	GO:0022836	gated channel activity	6/61	337/18352	0.000870634	0.00952576	0.00727774	KCNE1/CHRNE/GRID2/CHRNA9/SCN10A/CACNA1I	6
GO:0022853	MF	GO:0022853	active ion transmembrane transporter activity	5/61	229/18352	0.000975967	0.00971748	0.00742422	ATP2B2/SLC5A12/ATP4A/ATP4B/ATP1A3	5
GO:0022824	MF	GO:0022824	transmitter-gated ion channel activity	3/61	60/18352	0.00104489	0.00971748	0.00742422	CHRNE/GRID2/CHRNA9	3
GO:0022835	MF	GO:0022835	transmitter-gated channel activity	3/61	60/18352	0.00104489	0.00971748	0.00742422	CHRNE/GRID2/CHRNA9	3
GO:0005149	MF	GO:0005149	interleukin-1 receptor binding	2/61	16/18352	0.00126559	0.0106596	0.008144	IL36RN/IL1F10	2
GO:0022848	MF	GO:0022848	acetylcholine-gated cation-selective channel activity	2/61	16/18352	0.00126559	0.0106596	0.008144	CHRNE/CHRNA9	2
GO:0098960	MF	GO:0098960	postsynaptic neurotransmitter receptor activity	3/61	65/18352	0.00131812	0.0106596	0.008144	CHRNE/GRID2/CHRNA9	3
GO:0008553	MF	GO:0008553	proton-exporting ATPase activity, phosphorylative mechanism	2/61	17/18352	0.00143127	0.0110923	0.00847461	ATP4A/ATP4B	2
GO:0015079	MF	GO:0015079	potassium ion transmembrane transporter activity	4/61	156/18352	0.00179943	0.0133878	0.0102283	KCNE1/ATP4A/ATP4B/ATP1A3	4
GO:0005230	MF	GO:0005230	extracellular ligand-gated ion channel activity	3/61	74/18352	0.00191515	0.0137007	0.0104674	CHRNE/GRID2/CHRNA9	3
GO:0005546	MF	GO:0005546	phosphatidylinositol-4,5-bisphosphate binding	3/61	82/18352	0.00256763	0.0174618	0.0133409	AMER3/PLA2G4E/GSDMA	3
GO:0005248	MF	GO:0005248	voltage-gated sodium channel activity	2/61	23/18352	0.00262865	0.0174618	0.0133409	SCN10A/CACNA1I	2
GO:0005216	MF	GO:0005216	ion channel activity	6/61	431/18352	0.00302457	0.019399	0.014821	KCNE1/CHRNE/GRID2/CHRNA9/SCN10A/CACNA1I	6
GO:0005231	MF	GO:0005231	excitatory extracellular ligand-gated ion channel activity	2/61	30/18352	0.00445261	0.0267156	0.0204109	CHRNE/CHRNA9	2
GO:0070273	MF	GO:0070273	phosphatidylinositol-4-phosphate binding	2/61	30/18352	0.00445261	0.0267156	0.0204109	PLA2G4E/GSDMA	2
GO:0009678	MF	GO:0009678	pyrophosphate hydrolysis-driven proton transmembrane transporter activity	2/61	31/18352	0.00474955	0.0271554	0.0207469	ATP4A/ATP4B	2
GO:0005261	MF	GO:0005261	cation channel activity	5/61	334/18352	0.00501145	0.0271554	0.0207469	KCNE1/CHRNE/CHRNA9/SCN10A/CACNA1I	5
GO:0015267	MF	GO:0015267	channel activity	6/61	479/18352	0.00505892	0.0271554	0.0207469	KCNE1/CHRNE/GRID2/CHRNA9/SCN10A/CACNA1I	6
GO:0022803	MF	GO:0022803	passive transmembrane transporter activity	6/61	480/18352	0.00510989	0.0271554	0.0207469	KCNE1/CHRNE/GRID2/CHRNA9/SCN10A/CACNA1I	6
GO:1902936	MF	GO:1902936	phosphatidylinositol bisphosphate binding	3/61	119/18352	0.00727889	0.0376076	0.0287324	AMER3/PLA2G4E/GSDMA	3
GO:0005272	MF	GO:0005272	sodium channel activity	2/61	44/18352	0.00939882	0.0472481	0.0360979	SCN10A/CACNA1I	2
GO:0015085	MF	GO:0015085	calcium ion transmembrane transporter activity	3/61	134/18352	0.0100635	0.0492583	0.0376337	ATP2B2/CHRNA9/CACNA1I	3

## Sheet: go.pink
ONTOLOGY	ID	Description	GeneRatio	BgRatio	pvalue	p.adjust	qvalue	geneID	Count
GO:0007608	BP	GO:0007608	sensory perception of smell	17/63	452/18866	7.71259e-14	5.79215e-11	5.32574e-11	CNGB1/OR11A1/GFY/OR4F5/OR2T29/OR2T4/OR5T3/OR8B2/OR3A1/OR5K3/OR5AK2/OR1G1/OR3A2/OR11H4/OR5B2/OR4C46/OR2V1	17
GO:0050907	BP	GO:0050907	detection of chemical stimulus involved in sensory perception	16/63	472/18866	2.27787e-12	8.55339e-10	7.86464e-10	GNAT1/OR11A1/OR4F5/OR2T29/OR2T4/OR5T3/OR8B2/OR3A1/OR5K3/OR5AK2/OR1G1/OR3A2/OR11H4/OR5B2/OR4C46/OR2V1	16
GO:0050911	BP	GO:0050911	detection of chemical stimulus involved in sensory perception of smell	15/63	427/18866	7.43428e-12	1.86105e-09	1.71119e-09	OR11A1/OR4F5/OR2T29/OR2T4/OR5T3/OR8B2/OR3A1/OR5K3/OR5AK2/OR1G1/OR3A2/OR11H4/OR5B2/OR4C46/OR2V1	15
GO:0007187	BP	GO:0007187	G protein-coupled receptor signaling pathway, coupled to cyclic nucleotide second messenger	7/63	263/18866	2.68539e-05	0.00504183	0.00463584	GNAT1/HTR1D/GPR101/OR5T3/PF4/OR11H4/OPRD1	7
GO:0098664	BP	GO:0098664	G protein-coupled serotonin receptor signaling pathway	3/63	34/18866	0.000197235	0.0269375	0.0247684	HTR1D/OR5T3/OR11H4	3
GO:0007603	BP	GO:0007603	phototransduction, visible light	3/63	35/18866	0.000215213	0.0269375	0.0247684	GNAT1/CNGB1/ABCA4	3
GO:0007210	BP	GO:0007210	serotonin receptor signaling pathway	3/63	39/18866	0.000297663	0.031935	0.0293635	HTR1D/OR5T3/OR11H4	3
GO:0045494	BP	GO:0045494	photoreceptor cell maintenance	3/63	41/18866	0.000345556	0.032439	0.0298269	CNGB1/RP1L1/ABCA4	3
GO:0042461	BP	GO:0042461	photoreceptor cell development	3/63	48/18866	0.000551418	0.0460128	0.0423076	GNAT1/CNGB1/RP1L1	3
GO:0001750	CC	GO:0001750	photoreceptor outer segment	4/68	89/19559	0.000261197	0.0304653	0.0253516	GNAT1/CNGB1/RP1L1/ABCA4	4
GO:0097733	CC	GO:0097733	photoreceptor cell cilium	4/68	117/19559	0.000737338	0.0304653	0.0253516	GNAT1/CNGB1/RP1L1/ABCA4	4
GO:1902495	CC	GO:1902495	transmembrane transporter complex	6/68	322/19559	0.000882524	0.0304653	0.0253516	GRIN2B/CNGB1/KCNG4/CACNG1/CATSPER1/ABCG5	6
GO:1990351	CC	GO:1990351	transporter complex	6/68	330/19559	0.00100178	0.0304653	0.0253516	GRIN2B/CNGB1/KCNG4/CACNG1/CATSPER1/ABCG5	6
GO:0034703	CC	GO:0034703	cation channel complex	5/68	221/19559	0.00102923	0.0304653	0.0253516	GRIN2B/CNGB1/KCNG4/CACNG1/CATSPER1	5
GO:0097731	CC	GO:0097731	9+0 non-motile cilium	4/68	139/19559	0.00139877	0.0345031	0.0287117	GNAT1/CNGB1/RP1L1/ABCA4	4
GO:0031093	CC	GO:0031093	platelet alpha granule lumen	3/68	67/19559	0.00164226	0.034722	0.0288939	KNG1/PF4/AHSG	3
GO:0004984	MF	GO:0004984	olfactory receptor activity	15/60	427/18352	5.07892e-12	7.82154e-10	5.82739e-10	OR11A1/OR4F5/OR2T29/OR2T4/OR5T3/OR8B2/OR3A1/OR5K3/OR5AK2/OR1G1/OR3A2/OR11H4/OR5B2/OR4C46/OR2V1	15
GO:0004993	MF	GO:0004993	G protein-coupled serotonin receptor activity	3/60	34/18352	0.000184967	0.00949496	0.00707417	HTR1D/OR5T3/OR11H4	3
GO:0099589	MF	GO:0099589	serotonin receptor activity	3/60	34/18352	0.000184967	0.00949496	0.00707417	HTR1D/OR5T3/OR11H4	3
GO:0005549	MF	GO:0005549	odorant binding	4/60	103/18352	0.000358474	0.0104772	0.007806	OR8B2/OR5K3/OR5AK2/OR5B2	4
GO:0005244	MF	GO:0005244	voltage-gated ion channel activity	5/60	197/18352	0.000458397	0.0104772	0.007806	GRIN2B/KCNG4/CACNG1/CATSPER1/KCNK16	5
GO:0022832	MF	GO:0022832	voltage-gated channel activity	5/60	197/18352	0.000458397	0.0104772	0.007806	GRIN2B/KCNG4/CACNG1/CATSPER1/KCNK16	5
GO:0030594	MF	GO:0030594	neurotransmitter receptor activity	4/60	111/18352	0.000476237	0.0104772	0.007806	GRIN2B/HTR1D/OR5T3/OR11H4	4
GO:0008227	MF	GO:0008227	G protein-coupled amine receptor activity	3/60	51/18352	0.000618789	0.0114391	0.00852266	HTR1D/OR5T3/OR11H4	3
GO:0005261	MF	GO:0005261	cation channel activity	6/60	334/18352	0.000760898	0.0114391	0.00852266	GRIN2B/CNGB1/KCNG4/CACNG1/CATSPER1/KCNK16	6
GO:0022836	MF	GO:0022836	gated channel activity	6/60	337/18352	0.00079712	0.0114391	0.00852266	GRIN2B/CNGB1/KCNG4/CACNG1/CATSPER1/KCNK16	6
GO:0015267	MF	GO:0015267	channel activity	7/60	479/18352	0.0009234	0.0114391	0.00852266	GRIN2B/CNGB1/GJB7/KCNG4/CACNG1/CATSPER1/KCNK16	7
GO:0022803	MF	GO:0022803	passive transmembrane transporter activity	7/60	480/18352	0.000934694	0.0114391	0.00852266	GRIN2B/CNGB1/GJB7/KCNG4/CACNG1/CATSPER1/KCNK16	7
GO:0015085	MF	GO:0015085	calcium ion transmembrane transporter activity	4/60	134/18352	0.000965641	0.0114391	0.00852266	GRIN2B/ATP2B3/CACNG1/CATSPER1	4
GO:0022843	MF	GO:0022843	voltage-gated cation channel activity	4/60	140/18352	0.00113616	0.0124977	0.00931136	GRIN2B/KCNG4/CACNG1/CATSPER1	4
GO:0072509	MF	GO:0072509	divalent inorganic cation transmembrane transporter activity	4/60	162/18352	0.00194271	0.0199452	0.0148601	GRIN2B/ATP2B3/CACNG1/CATSPER1	4
GO:0046873	MF	GO:0046873	metal ion transmembrane transporter activity	6/60	428/18352	0.00268641	0.0251929	0.0187698	GRIN2B/ATP2B3/KCNG4/CACNG1/CATSPER1/KCNK16	6
GO:0005216	MF	GO:0005216	ion channel activity	6/60	431/18352	0.00278104	0.0251929	0.0187698	GRIN2B/CNGB1/KCNG4/CACNG1/CATSPER1/KCNK16	6
GO:0004866	MF	GO:0004866	endopeptidase inhibitor activity	4/60	183/18352	0.00301971	0.0258353	0.0192484	SERPINA7/SERPINI2/KNG1/AHSG	4
GO:0030414	MF	GO:0030414	peptidase inhibitor activity	4/60	189/18352	0.00338976	0.0274749	0.02047	SERPINA7/SERPINI2/KNG1/AHSG	4
GO:0061135	MF	GO:0061135	endopeptidase regulator activity	4/60	192/18352	0.00358589	0.0276113	0.0205717	SERPINA7/SERPINI2/KNG1/AHSG	4
GO:0042626	MF	GO:0042626	ATPase-coupled transmembrane transporter activity	3/60	100/18352	0.00428989	0.0314592	0.0234385	ATP2B3/ABCG5/ABCA4	3
GO:0015399	MF	GO:0015399	primary active transmembrane transporter activity	3/60	107/18352	0.00518151	0.0362706	0.0270232	ATP2B3/ABCG5/ABCA4	3
GO:0061134	MF	GO:0061134	peptidase regulator activity	4/60	229/18352	0.00667099	0.0429924	0.0320312	SERPINA7/SERPINI2/KNG1/AHSG	4
GO:0005262	MF	GO:0005262	calcium channel activity	3/60	118/18352	0.00679366	0.0429924	0.0320312	GRIN2B/CACNG1/CATSPER1	3
GO:0005539	MF	GO:0005539	glycosaminoglycan binding	4/60	232/18352	0.00697928	0.0429924	0.0320312	RSPO4/PGLYRP2/KNG1/PF4	4

## Sheet: go.red
	ONTOLOGY	ID	Description	GeneRatio	BgRatio	pvalue	p.adjust	qvalue	geneID	Count
GO:0031295	BP	GO:0031295	T cell costimulation	6/86	56/18866	2.0336e-07	0.000189762	0.000170343	KLRK1/CD274/CD80/CD28/CCR7/BTLA	6
GO:0031294	BP	GO:0031294	lymphocyte costimulation	6/86	58/18866	2.51673e-07	0.000189762	0.000170343	KLRK1/CD274/CD80/CD28/CCR7/BTLA	6
GO:1903039	BP	GO:1903039	positive regulation of leukocyte cell-cell adhesion	8/86	235/18866	1.18341e-05	0.00594862	0.00533989	KLRK1/CD274/CD80/CD28/CCR7/BTLA/SKAP1/IL12RB1	8
GO:1903037	BP	GO:1903037	regulation of leukocyte cell-cell adhesion	9/86	329/18866	1.8916e-05	0.00713135	0.00640159	KLRK1/CD274/PLA2G2D/CD80/CD28/CCR7/BTLA/SKAP1/IL12RB1	9
GO:0035589	BP	GO:0035589	G protein-coupled purinergic nucleotide receptor signaling pathway	3/86	14/18866	3.21033e-05	0.00899183	0.00807169	P2RY13/P2RY14/P2RY8	3
GO:0022409	BP	GO:0022409	positive regulation of cell-cell adhesion	8/86	279/18866	4.04967e-05	0.00899183	0.00807169	KLRK1/CD274/CD80/CD28/CCR7/BTLA/SKAP1/IL12RB1	8
GO:0007159	BP	GO:0007159	leukocyte cell-cell adhesion	9/86	364/18866	4.17393e-05	0.00899183	0.00807169	KLRK1/CD274/PLA2G2D/CD80/CD28/CCR7/BTLA/SKAP1/IL12RB1	9
GO:0050870	BP	GO:0050870	positive regulation of T cell activation	7/86	214/18866	5.51037e-05	0.010387	0.00932413	KLRK1/CD274/CD80/CD28/CCR7/BTLA/IL12RB1	7
GO:0042089	BP	GO:0042089	cytokine biosynthetic process	3/86	20/18866	9.85737e-05	0.0165166	0.0148264	IGF2BP3/CD80/CD28	3
GO:0042107	BP	GO:0042107	cytokine metabolic process	3/86	21/18866	0.000114624	0.0172853	0.0155165	IGF2BP3/CD80/CD28	3
GO:0050863	BP	GO:0050863	regulation of T cell activation	8/86	332/18866	0.000136171	0.0184891	0.0165971	KLRK1/CD274/PLA2G2D/CD80/CD28/CCR7/BTLA/IL12RB1	8
GO:0002821	BP	GO:0002821	positive regulation of adaptive immune response	5/86	110/18866	0.000147128	0.0184891	0.0165971	CD274/CD80/CD28/SKAP1/IL12RB1	5
GO:0022407	BP	GO:0022407	regulation of cell-cell adhesion	9/86	439/18866	0.000173815	0.0201626	0.0180993	KLRK1/CD274/PLA2G2D/CD80/CD28/CCR7/BTLA/SKAP1/IL12RB1	9
GO:0019835	BP	GO:0019835	cytolysis	3/86	29/18866	0.000306728	0.033039	0.0296581	GZMB/GZMA/GZMH	3
GO:0002861	BP	GO:0002861	regulation of inflammatory response to antigenic stimulus	3/86	33/18866	0.000452008	0.0426017	0.0382422	PLA2G2D/CD28/CCR7	3
GO:0035590	BP	GO:0035590	purinergic nucleotide receptor signaling pathway	3/86	33/18866	0.000452008	0.0426017	0.0382422	P2RY13/P2RY14/P2RY8	3
GO:0046631	BP	GO:0046631	alpha-beta T cell activation	5/86	146/18866	0.000545572	0.0483955	0.0434431	CD274/PLA2G2D/CD80/CD28/IL12RB1	5
GO:0009897	CC	GO:0009897	external side of plasma membrane	10/89	417/19559	1.97534e-05	0.0019835	0.00184226	KLRK1/CCR8/AQP4/CD274/CD80/CD28/ADAM21/CCR7/KLRD1/IL12RB1	10
GO:0001772	CC	GO:0001772	immunological synapse	4/89	39/19559	2.91691e-05	0.0019835	0.00184226	GZMB/CD28/SKAP1/GZMA	4
GO:0005819	CC	GO:0005819	spindle	7/89	367/19559	0.001426	0.0489059	0.0454235	SKA3/CKAP2L/SHCBP1/ASPM/HEPACAM2/KIF4A/PLK1	7
GO:0030496	CC	GO:0030496	midbody	5/89	182/19559	0.00145816	0.0489059	0.0454235	SHCBP1/ASPM/HEPACAM2/KIF4A/PLK1	5
GO:0000940	CC	GO:0000940	condensed chromosome outer kinetochore	2/89	14/19559	0.00179801	0.0489059	0.0454235	SKA3/PLK1	2
GO:0045028	MF	GO:0045028	G protein-coupled purinergic nucleotide receptor activity	3/83	14/18352	3.13232e-05	0.00354752	0.00302632	P2RY13/P2RY14/P2RY8	3
GO:0140375	MF	GO:0140375	immune receptor activity	6/83	135/18352	3.36258e-05	0.00354752	0.00302632	KLRK1/CCR8/CCR7/IL12RB1/IL21R/IL9R	6
GO:0004896	MF	GO:0004896	cytokine receptor activity	5/83	97/18352	7.79252e-05	0.00472059	0.00402704	CCR8/CCR7/IL12RB1/IL21R/IL9R	5
GO:0001614	MF	GO:0001614	purinergic nucleotide receptor activity	3/83	21/18352	0.000111862	0.00472059	0.00402704	P2RY13/P2RY14/P2RY8	3
GO:0016502	MF	GO:0016502	nucleotide receptor activity	3/83	21/18352	0.000111862	0.00472059	0.00402704	P2RY13/P2RY14/P2RY8	3
GO:0015026	MF	GO:0015026	coreceptor activity	3/83	48/18352	0.00133225	0.0468507	0.0399674	CCR8/CD80/CD28	3

## Sheet: go.salmon
ONTOLOGY	ID	Description	GeneRatio	BgRatio	pvalue	p.adjust	qvalue	geneID	Count
GO:0050911	BP	GO:0050911	detection of chemical stimulus involved in sensory perception of smell	7/35	427/18866	1.12595e-05	0.00367691	0.00348565	OR4F17/OR2L3/OR56A1/OR52A5/OR6C3/OR5AC2/OR5B17	7
GO:0007608	BP	GO:0007608	sensory perception of smell	7/35	452/18866	1.62712e-05	0.00367691	0.00348565	OR4F17/OR2L3/OR56A1/OR52A5/OR6C3/OR5AC2/OR5B17	7
GO:0050907	BP	GO:0050907	detection of chemical stimulus involved in sensory perception	7/35	472/18866	2.15024e-05	0.00367691	0.00348565	OR4F17/OR2L3/OR56A1/OR52A5/OR6C3/OR5AC2/OR5B17	7
GO:0004984	MF	GO:0004984	olfactory receptor activity	7/35	427/18352	1.34521e-05	0.00138556	0.00104784	OR4F17/OR2L3/OR56A1/OR52A5/OR6C3/OR5AC2/OR5B17	7
