# Supplementary material for: Identification of biomarkers for immunotherapy response in prostate cancer and potential drugs to alleviate immunosuppression
Source: Aging (Albany NY). 2022 Jun 8;14(11):4839–57. doi: 10.18632/aging.204115 (PMC9217695; doi:10.18632/aging.204115)
Supplement: Supplementary Table 2 [file aging-14-204115-s003.xlsx]

## Sheet: kegg.turquoise
Supplementary Table 2. KEGG enrichment analysis of immune-response related genes of seven modules.
ID	Description	GeneRatio	BgRatio	pvalue	p.adjust	qvalue	geneID	Count
hsa04080	hsa04080	Neuroactive ligand-receptor interaction	17/136	353/8109	7.9421e-05	0.0178697	0.0168874	GRIN2D/ADORA3/GRIN3B/ADRA2A/ADRA2B/GPR35/ADRA2C/P2RY2/GRM7/ADM2/GRM6/CHRNA10/GRIN1/HTR4/S1PR4/GRIN2C/OXT	17
hsa04020	hsa04020	Calcium signaling pathway	13/136	240/8109	0.000184505	0.0207568	0.0196158	GRIN2D/PLCG2/PDGFB/SLC8A2/PDE1B/CACNA1H/CACNA1B/PDE1C/CALML3/GRIN1/CACNA1G/HTR4/GRIN2C	13
hsa05033	hsa05033	Nicotine addiction	5/136	40/8109	0.000506101	0.0379576	0.035871	GRIN2D/GRIN3B/CACNA1B/GRIN1/GRIN2C	5

## Sheet: kegg.cyan
ID	Description	GeneRatio	BgRatio	pvalue	p.adjust	qvalue	geneID	Count
hsa05310	hsa05310	Asthma	2022-02-11	31/8109	0.000761448	0.0167518	0.0112213	IL5/IL13	2
hsa04740	hsa04740	Olfactory transduction	2022-04-11	441/8109	0.00209651	0.0199621	0.0133718	OR4E2/OR2T35/OR1E2/OR2A12	4
hsa05321	hsa05321	Inflammatory bowel disease	2022-02-11	65/8109	0.00332138	0.0199621	0.0133718	IL5/IL13	2
hsa04664	hsa04664	Fc epsilon RI signaling pathway	2022-02-11	68/8109	0.00362948	0.0199621	0.0133718	IL5/IL13	2
hsa04658	hsa04658	Th1 and Th2 cell differentiation	2022-02-11	92/8109	0.006552	0.0250486	0.016779	IL5/IL13	2
hsa04657	hsa04657	IL-17 signaling pathway	2022-02-11	94/8109	0.00683144	0.0250486	0.016779	IL5/IL13	2

## Sheet: kegg.pink
ID	Description	GeneRatio	BgRatio	pvalue	p.adjust	qvalue	geneID	Count
hsa04740	hsa04740	Olfactory transduction	16/40	441/8109	8.41054e-11	7.65359e-09	7.52522e-09	CNGB1/OR11A1/OR4F5/OR2T29/OR2T4/OR5T3/OR8B2/OR3A1/OR5K3/OR5AK2/OR1G1/OR3A2/OR11H4/OR5B2/OR4C46/OR2V1	16

## Sheet: kegg.red
ID	Description	GeneRatio	BgRatio	pvalue	p.adjust	qvalue	geneID	Count
hsa05332	hsa05332	Graft-versus-host disease	4/37	42/8109	3.62779e-05	0.00391801	0.0035896	CD80/GZMB/CD28/KLRD1	4
hsa04080	hsa04080	Neuroactive ligand-receptor interaction	8/37	353/8109	0.000151627	0.00818783	0.00750152	P2RY13/P2RY14/P2RY8/LHCGR/GRIN3A/GZMA/CHRNA5/PATE3	8
hsa05330	hsa05330	Allograft rejection	3/37	38/8109	0.000660949	0.0237942	0.0217997	CD80/GZMB/CD28	3
hsa04940	hsa04940	Type I diabetes mellitus	3/37	43/8109	0.000951852	0.0257	0.0235458	CD80/GZMB/CD28	3
hsa05320	hsa05320	Autoimmune thyroid disease	3/37	53/8109	0.00175108	0.0378232	0.0346529	CD80/GZMB/CD28	3

## Sheet: kegg.salmon
ID	Description	GeneRatio	BgRatio	pvalue	p.adjust	qvalue	geneID	Count
hsa04740	hsa04740	Olfactory transduction	2022-07-24	441/8109	0.000206766	0.00951126	0.0093589	OR4F17/OR2L3/OR56A1/OR52A5/OR6C3/OR5AC2/OR5B17	7
hsa04610	hsa04610	Complement and coagulation cascades	2022-03-24	85/8109	0.00191902	0.0441374	0.0434304	CFHR5/C8A/SERPINB2	3
hsa04080	hsa04080	Neuroactive ligand-receptor interaction	2022-05-24	353/8109	0.00325626	0.0499293	0.0491295	HTR2C/CHRNA6/RXFP2/NTS/PDYN	5

## Sheet: kegg.green
ID	Description	GeneRatio	BgRatio	pvalue	p.adjust	qvalue	geneID	Count
hsa04740	hsa04740	Olfactory transduction	11/42	441/8109	1.00238e-05	0.00103245	0.00102348	OR5H6/OR2A14/OR56B4/OR2J2/OR5T1/OR2B11/OR4D6/OR51L1/OR1I1/OR5M9/OR8B3	11
hsa04742	hsa04742	Taste transduction	4/42	86/8109	0.000970892	0.038361	0.0380277	SCN2A/HTR1F/CACNA1A/HTR3E	4
hsa05033	hsa05033	Nicotine addiction	3/42	40/8109	0.00111731	0.038361	0.0380277	GRIN2A/SLC17A7/CACNA1A	3
