# Supplementary material for: Identification of biomarkers for immunotherapy response in prostate cancer and potential drugs to alleviate immunosuppression
Source: Aging (Albany NY). 2022 Jun 8;14(11):4839–57. doi: 10.18632/aging.204115 (PMC9217695; doi:10.18632/aging.204115)
Supplement: Supplementary Table 3 [file aging-14-204115-s004.xlsx]

## Sheet: compound.gsea
Supplementary Table 3. The core genes regulated by 11 drugs from Gene Set Enrichment Analysis.
	ID	Description	setSize	enrichmentScore	NES	pvalue	p.adjust	qvalues	rank	leading_edge	core_enrichment
resveratrol	resveratrol	resveratrol	40	-0.527208	-1.68	0.00316634	0.00316634	NA	2291	tags=62%, list=30%, signal=44%	HCRTR2/ARFGAP1/SNRNP70/IGFBP1/CCDC9/ASMTL-AS1/ARHGEF16/KRT84/KRTAP5-8/ARFRP1/GK2/SH3TC1/PPP2R3B/CHPF/CETN1/ARHGAP33/AP5Z1/CAPN10/AGPAT2/PALM/ANAPC2/PDHA2/CLASRP/BAHCC1/C15orf39
I-BET-762	I-BET-762	I-BET-762	40	-0.507817	-1.59852	0.00763994	0.00763994	NA	2138	tags=85%, list=28%, signal=61%	ARFGAP1/SIX5/KRT38/ATN1/ADCK2/IGFBP1/ARHGAP33/POU4F2/ARHGEF1/HCRTR2/ALPPL2/SLC5A12/ASMTL-AS1/SNRNP70/ARFRP1/PDYN/ANAPC2/ARHGEF16/CCDC9/CAPN10/PPP2R3B/AP5Z1/AGPAT2/KRTAP5-8/SH3TC1/CETN1/CHPF/GK2/KRT84/PALM/BAHCC1/C15orf39/CLASRP/PDHA2
belinostat	belinostat	belinostat	40	-0.510418	-1.63027	0.010113	0.010113	NA	2247	tags=57%, list=30%, signal=41%	ARFGAP1/AP5Z1/PPP2R3B/CD5L/SNRNP70/ASMTL-AS1/ARFRP1/CCDC9/ARHGEF16/CETN1/CAPN10/KRT84/CHPF/KRTAP5-8/PDHA2/ANAPC2/IGFBP1/PALM/SH3TC1/AGPAT2/CLASRP/BAHCC1/C15orf39
OSI-027	OSI-027	OSI-027	40	-0.451545	-1.45978	0.0497449	0.0497449	NA	3294	tags=75%, list=43%, signal=43%	KRT38/HCRTR2/ADCK2/PDYN/CCDC9/SIX5/ARFGAP1/ATN1/ASMTL-AS1/CHPF/KRTAP5-8/ARHGEF16/ARHGAP33/CETN1/SNRNP70/GK2/PPP2R3B/ARFRP1/AP5Z1/AGPAT2/ANAPC2/SH3TC1/KRT84/CAPN10/PALM/PDHA2/BAHCC1/C15orf39/CLASRP/IGFBP1
CHIR-99021	CHIR-99021	CHIR-99021	40	0.568423	1.75313	0.000979529	0.000979529	NA	1900	tags=65%, list=25%, signal=49%	H1FX/SH3TC1/CA9/ARHGEF16/PALM/PPP2R3B/KRTAP5-8/AGPAT2/C15orf39/CETN1/ARHGAP33/ALPPL2/CLASRP/ANAPC2/CCDC9/KRT84/ARHGEF1/CAPN10/PDHA2/CD1A/ASMTL-AS1/SIX5/ARFRP1/AP5Z1/HCRTR2/SLC5A12
CYT387	CYT387	CYT387	40	0.526769	1.6317	0.00318393	0.00318393	NA	3108	tags=82%, list=41%, signal=49%	H1FX/PALM/PPP2R3B/CA9/AGPAT2/C15orf39/SLC5A12/CLASRP/KRTAP5-8/SIX5/CHPF/PDHA2/CAPN10/ARFRP1/ARHGAP33/ALPPL2/ANAPC2/CETN1/CCDC9/PDYN/KRT84/ARHGEF16/ARHGEF1/ASMTL-AS1/SH3TC1/HCRTR2/AP5Z1/GK2/ADCK2/BAHCC1/IGFBP1/KRT38/ATN1
roscovitine	roscovitine	roscovitine	40	0.513706	1.62587	0.0065907	0.0065907	NA	2868	tags=70%, list=38%, signal=44%	H1FX/IGFBP1/PPP2R3B/CETN1/KRTAP5-8/PDYN/ADCK2/PDHA2/ARFRP1/ARHGAP33/KRT84/ATN1/CAPN10/ANAPC2/ALPPL2/ASMTL-AS1/SIX5/SLC5A12/CLASRP/GK2/CCDC9/KRT38/PALM/ARHGEF1/HCRTR2/ARHGEF16/BAHCC1/ARFGAP1
ruxolitinib	ruxolitinib	ruxolitinib	40	0.507011	1.49909	0.0164045	0.0164045	NA	2917	tags=70%, list=38%, signal=43%	H1FX/C15orf39/ALPPL2/PALM/AGPAT2/KRTAP5-8/ARHGEF16/CAPN10/SIX5/ARFRP1/AP5Z1/CETN1/PPP2R3B/CHPF/CLASRP/SLC5A12/ARHGEF1/ADCK2/CCDC9/CD5L/KRT84/ASMTL-AS1/ARHGAP33/CA9/PDHA2/CD1A/ANAPC2/PDYN
BRD-K68548958	BRD-K68548958	BRD-K68548958	40	0.4723	1.44312	0.0293779	0.0293779	NA	3515	tags=82%, list=46%, signal=45%	PALM/ATN1/PDYN/HCRTR2/SLC5A12/CETN1/ARHGEF16/PDHA2/CHPF/ALPPL2/AP5Z1/KRTAP5-8/CD1A/GK2/ASMTL-AS1/SH3TC1/KRT38/CAPN10/ARHGAP33/CA9/POU4F2/KRT84/PPP2R3B/ANAPC2/BAHCC1/ARFRP1/SIX5/H1FX/ADCK2/C15orf39/ARFGAP1/CLASRP/CCDC9
radicicol	radicicol	radicicol	39	-0.494518	-1.52554	0.0176549	0.0176549	NA	2449	tags=77%, list=32%, signal=52%	PDYN/KIFC3/POU4F2/CAPN10/ARHGEF16/KRTAP5-8/ARFGAP1/HCRTR2/ANAPC2/KRT84/CA9/ARHGEF1/CD1A/ARFRP1/GK2/PDHA2/SLC5A12/SIX5/ASMTL-AS1/BAHCC1/AGPAT2/CLASRP/IGFBP1/AP5Z1/PPP2R3B/SH3TC1/CHPF/ARHGAP33/PALM/H1FX
PHA-793887	PHA-793887	PHA-793887	39	-0.494674	-1.47349	0.0378306	0.0378306	NA	1387	tags=33%, list=18%, signal=27%	ARHGEF1/SH3TC1/CLASRP/KRTAP5-8/CD5L/AGPAT2/CHPF/PPP2R3B/ARHGAP33/PALM/BAHCC1/H1FX/IGFBP1
